# Supplementary material
Source: publisher figshare collection journal article supplement (https://acs.figshare.com/ndownloader/files/4742614)

# PL spectra of nanoparticles and nanowires (D = 25 nm)

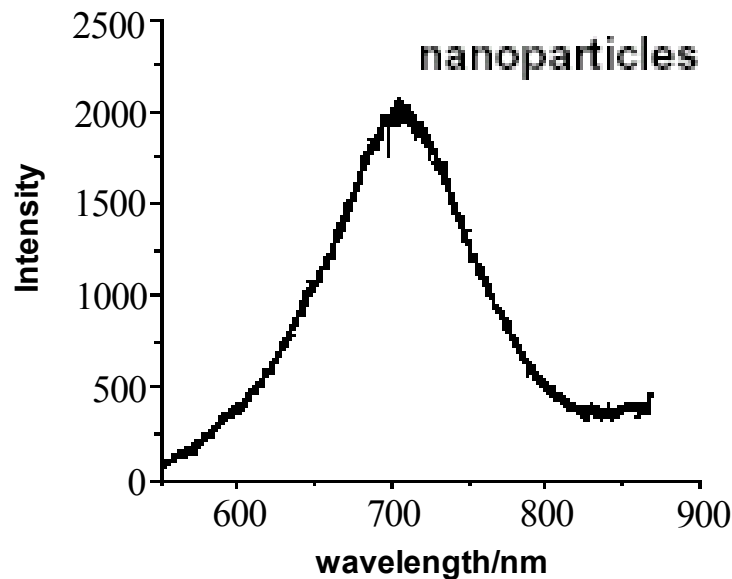

PL spectrum of nanoparticles obtained after one wetting cycle (FWHM  $\sim 80$  nm,  $\lambda_{\text{max}}$  corresponds to the bulk bandgap)

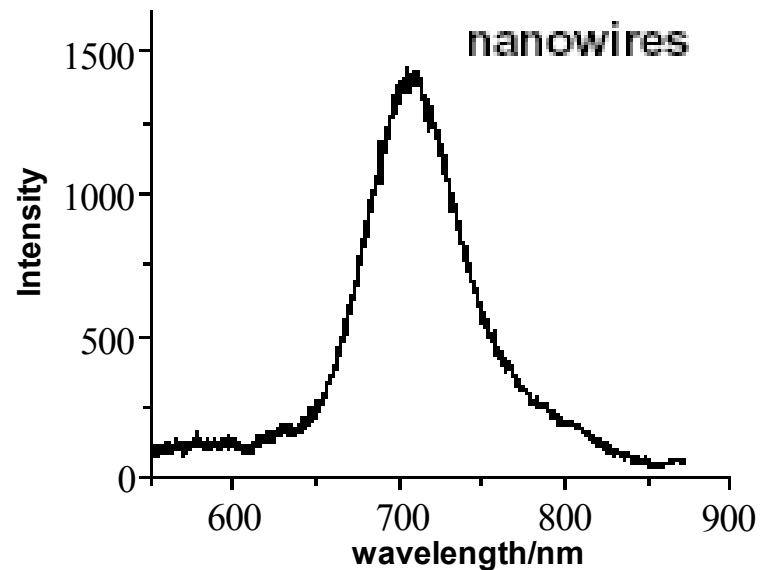

PL spectrum of nanowires obtained after four wetting cycles (FWHM  $\sim 57$  nm,  $\lambda_{\text{max}}$  corresponds to the bulk bandgap)

# EDX spectra of the CdSe nanowires (left) and of the removed brittle shell (right)

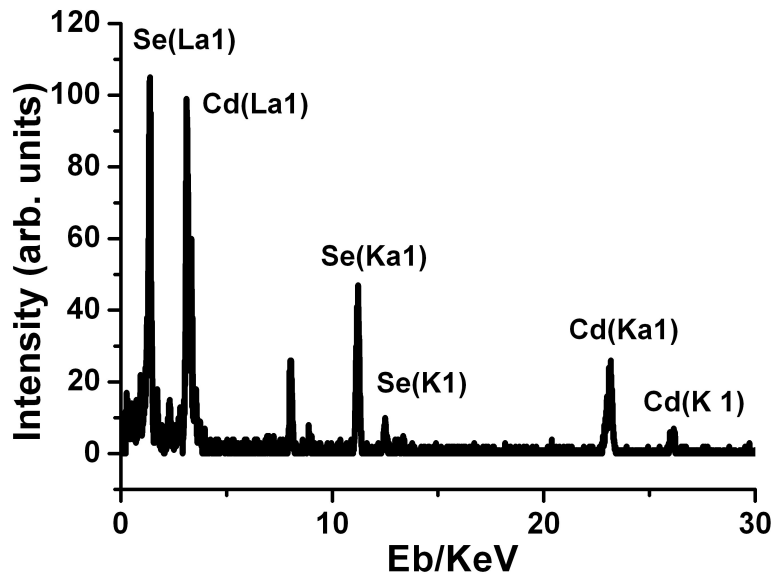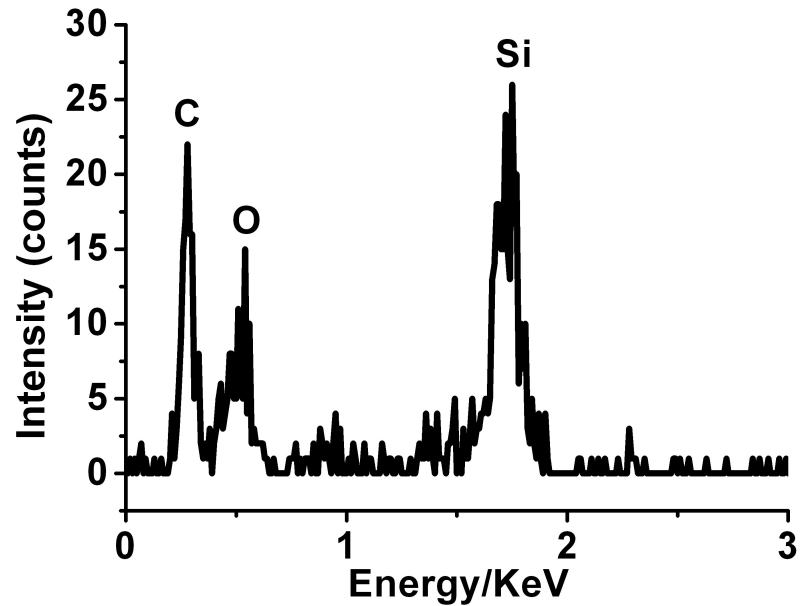

Supplement: Supplementary file 1 [file 4742614]
